# Supplementary material for: Theoretical study of the adsorption of analgesic environmental pollutants on pristine and nitrogen-doped graphene nanosheets
Source: Royal Society of Chemistry journal article supplement (doi:10.1039/d0cp05543c), 2020-12-23
Supplement: d0cp05543c1.pdf [file d0cp05543c1.pdf]

## Electronic Supplementary Information

**Title:** Theoretical Study of the Adsorption of Analgesic Environmental Pollutants on Pristine and Nitrogen-Doped Graphene Nanosheets

**Authors:** Richard H. Perry\*

**Affiliation:** Department of Chemistry and Physics, Nova Southeastern University, Fort Lauderdale, FL 33314

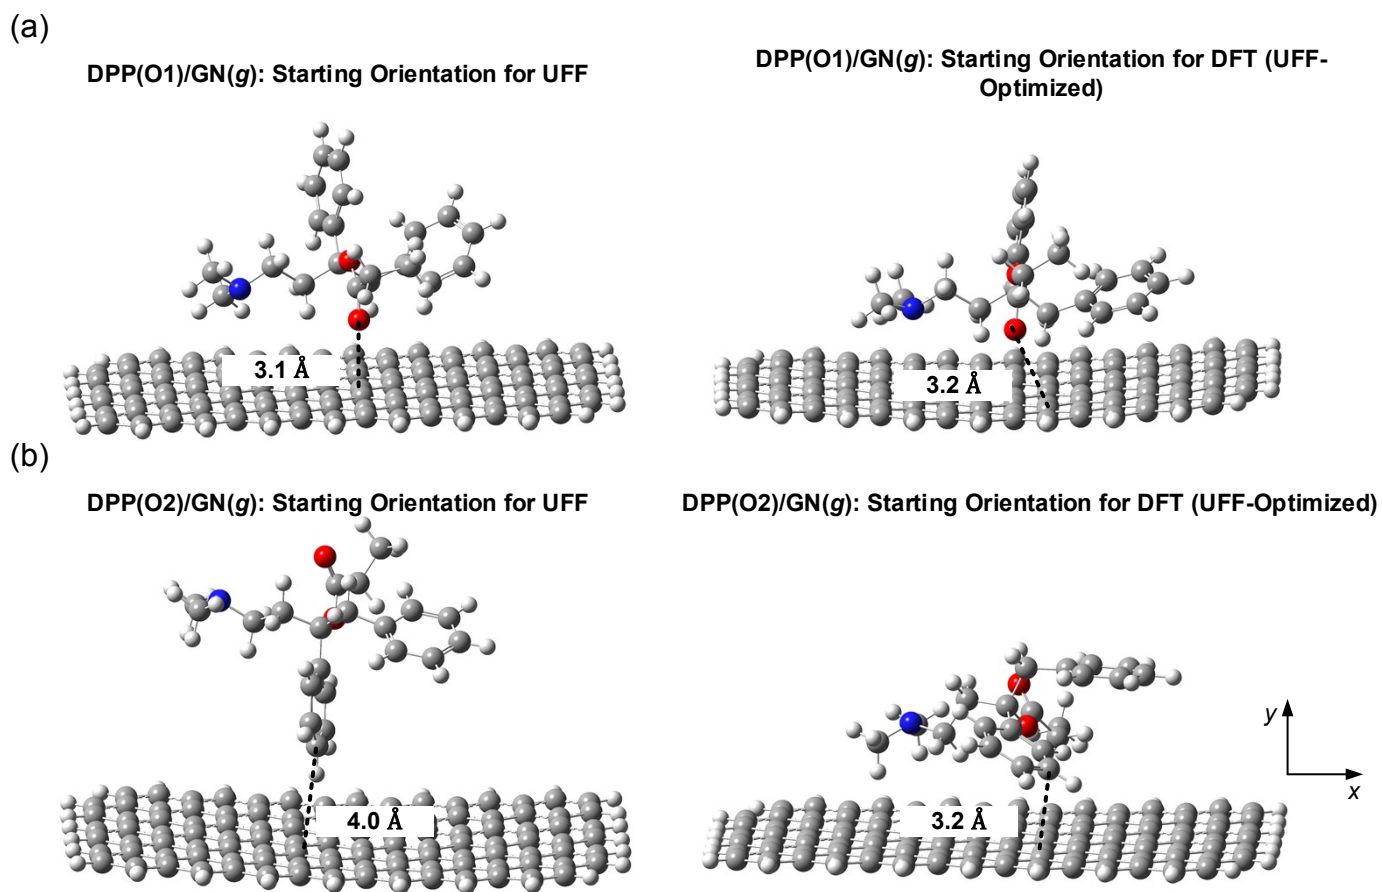

**Figure S1.** (a) DPP(O1)/GN(*g*) and (b) DPP(O2)/GN(*g*) starting orientations for calculations using the Universal Force Field (UFF) (left column) and Density Functional Theory (DFT) (right column). The starting orientation for DFT calculations were obtained from UFF geometry optimizations. (Atom colors: carbon (grey), hydrogen (white), oxygen (red), nitrogen (blue)).

**Table S1.** Vibrational frequency modes for each analgesic/nanosheet complex in the aqueous and gas phases. The lowest calculated

frequency mode is designated  $f_L$ . The three most intense frequency modes are designated  $f_1$ ,  $f_2$ , and  $f_3$ , in order of decreasing intensity (viz.  $f_1 > f_2 > f_3$ ).

| Complex     | Gas Phase                     |                               |                               |                               | Aqueous Phase                 |                               |                               |                               |
|-------------|-------------------------------|-------------------------------|-------------------------------|-------------------------------|-------------------------------|-------------------------------|-------------------------------|-------------------------------|
|             | $f_L$<br>( $\text{cm}^{-1}$ ) | $f_1$<br>( $\text{cm}^{-1}$ ) | $f_2$<br>( $\text{cm}^{-1}$ ) | $f_3$<br>( $\text{cm}^{-1}$ ) | $f_L$<br>( $\text{cm}^{-1}$ ) | $f_1$<br>( $\text{cm}^{-1}$ ) | $f_2$<br>( $\text{cm}^{-1}$ ) | $f_3$<br>( $\text{cm}^{-1}$ ) |
| GN          | 11.63                         | 899.39                        | 1447.55                       | 1219.34                       | 11.78                         | 140.36                        | 1444.84                       | 1216.84                       |
| DPP(O1)/GN  | 4.32                          | 1448.09                       | 1219.74                       | 898.51                        | 7.65                          | 141.20                        | 1445.48                       | 1567.27                       |
| DPP(O2)/GN  | 10.61                         | 1220.09                       | 1448.23                       | 899.49                        | 10.76                         | 1445.53                       | 1567.78                       | 1217.59                       |
| PCL(O1)/GN  | 10.94                         | 296.43                        | 1219.87                       | 1448.13                       | 10.92                         | 140.40                        | 1217.55                       | 1445.56                       |
| PCL(O2)/GN  | 10.66                         | 296.24                        | 1448.55                       | 1219.84                       | 11.89                         | 140.68                        | 1445.53                       | 1567.44                       |
| TDL(O1)/GN  | 10.96                         | 1219.84                       | 1447.68                       | 142.58                        | 9.53                          | 140.60                        | 1217.19                       | 1445.21                       |
| TDL(O2)/GN  | 11.06                         | 1448.24                       | 1220.27                       | 1570.12                       | 11.70                         | 140.70                        | 1445.44                       | 1217.80                       |
| IBN(O1)/GN  | 10.15                         | 1448.12                       | 1219.83                       | 899.43                        | 10.76                         | 140.58                        | 1445.29                       | 1567.36                       |
| IBN(O2)/GN  | 10.99                         | 899.42                        | 1219.79                       | 1448.04                       | 4.45                          | 140.53                        | 1445.29                       | 1217.38                       |
| NPX(O1)/GN  | 9.90                          | 1220.31                       | 1448.33                       | 142.94                        | 10.43                         | 140.49                        | 1217.90                       | 1445.66                       |
| NPX(O2)/GN  | 10.96                         | 1448.46                       | 1220.20                       | 143.01                        | 3.43                          | 3.43                          | 140.36                        | 1567.87                       |
| NGN         | 3.92                          | 1004.47                       | 800.67                        | 1335.98                       | 4.56                          | 797.97                        | 992.85                        | 980.57                        |
| DPP(O1)/NGN | 6.50                          | 1006.89                       | 1150.83                       | 1318.33                       | 6.62                          | 993.05                        | 1329.71                       | 1075.83                       |
| PCL(O2)/NGN | 9.03                          | 1367.65                       | 1007.07                       | 1581.85                       | 7.11                          | 971.69                        | 788.32                        | 1141.72                       |
| TDL(O1)/NGN | 8.04                          | 1599.61                       | 809.45                        | 1319.54                       | 7.22                          | 995.27                        | 981.77                        | 1330.88                       |
| IBN(O2)/NGN | 4.02                          | 812.30                        | 1007.07                       | 1337.35                       | 5.10                          | 799.38                        | 993.64                        | 983.94                        |
| NPX(O2)/NGN | 4.98                          | 798.24                        | 1005.66                       | 1336.86                       | 5.93                          | 979.90                        | 795.61                        | 1330.73                       |

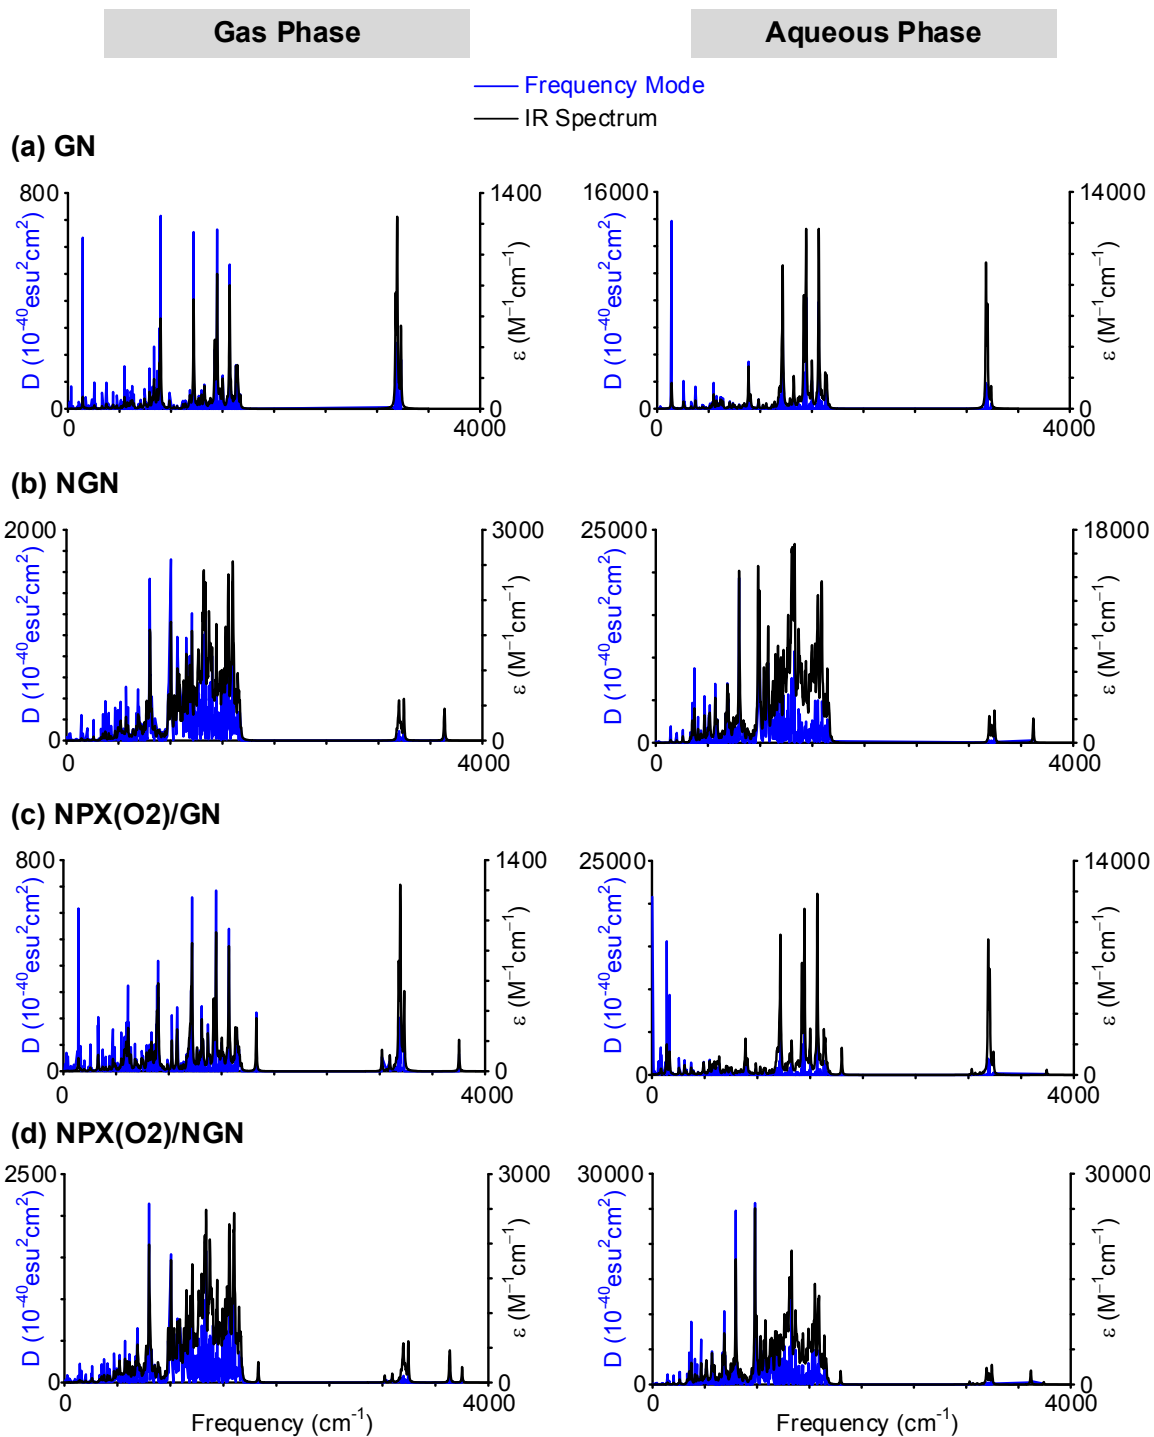

**Figure S2.** Calculated vibrational frequency modes and infrared spectra for (a) GN, (b) NGN, (c) NPX(O<sub>2</sub>)/GN, and (d) NPX(O<sub>2</sub>)/NGN in the gas and aqueous phases.

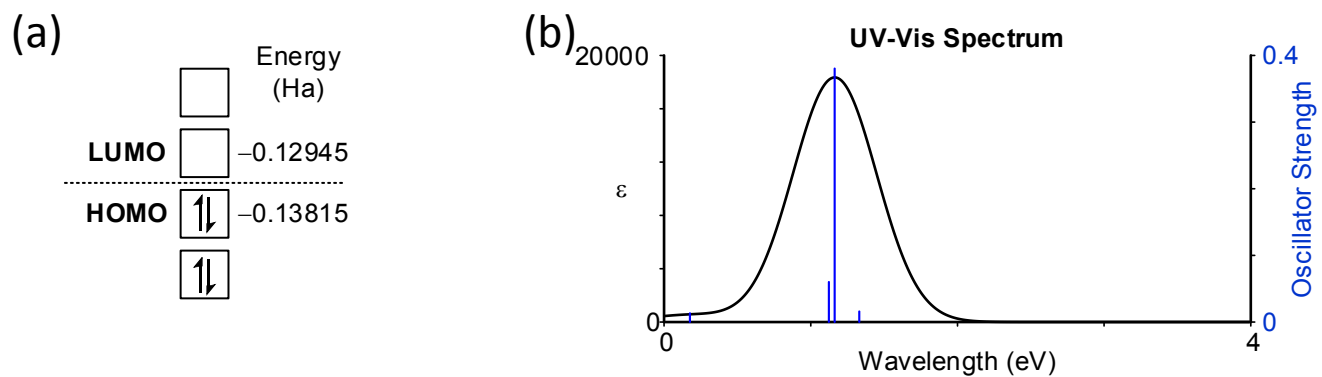

**Figure S3.** (a) Energies of the HOMO and LUMO for GN(*g*). HOMO =  $-3.76$  eV, LUMO =  $-3.52$  eV, HOMO-LUMO Gap =  $0.24$  eV. (b) Calculated UV-Vis spectrum for GN(*g*) obtained through time-dependent DFT (TD-DFT). The lowest excitation occurs at  $0.17$  eV with oscillator strength of  $0.013$  (specific excitation wavelengths are shown as blue lines). Based on these results, the calculated work function for GN(*g*) =  $|-3.76 + 0.17| = 3.59$  eV.

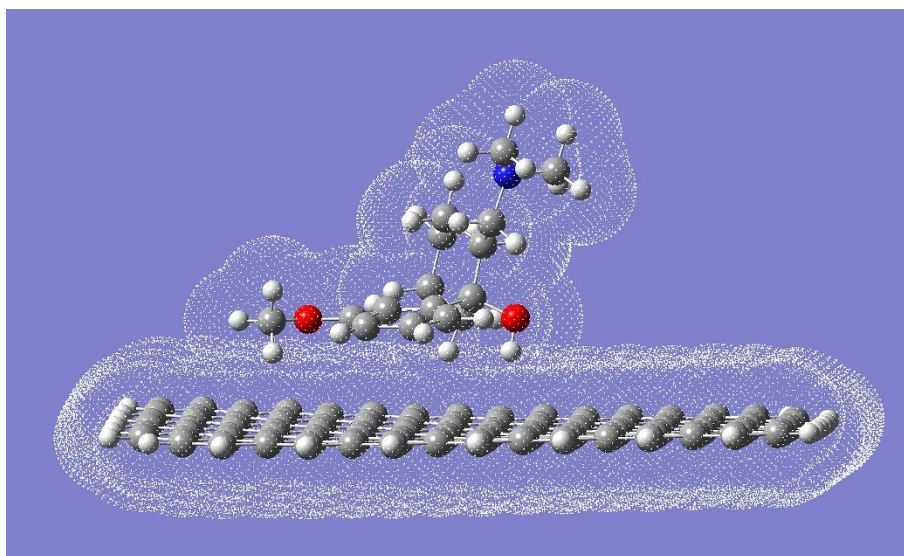

**Figure S4.** Geometry-optimized structure for TDL(O1)/GN(*aq*) showing the solvent cavity (small white dots represent water molecules; carbon (grey spheres); hydrogen (white spheres); oxygen (red spheres); nitrogen (blue spheres)).

**Table S2.** Electronic properties of analgesic/nanosheet complexes in the gas phase.

| Complex     | Gas Phase |           |                    |                               |                    |
|-------------|-----------|-----------|--------------------|-------------------------------|--------------------|
|             | HOMO (eV) | LUMO (eV) | HOMO-LUMO Gap (eV) | Lowest Energy Excitation (eV) | Work Function (eV) |
| DPP(O1)/GN  | -3.71     | -3.48     | 0.24               | 0.17                          | 3.54               |
| DPP(O2)/GN  | -3.81     | -3.58     | 0.24               | 0.17                          | 3.64               |
| PCL(O1)/GN  | -3.78     | -3.55     | 0.24               | 0.16                          | 3.62               |
| PCL(O2)/GN  | -3.78     | -3.54     | 0.24               | 0.18                          | 3.60               |
| TDL(O1)/GN  | -3.79     | -3.55     | 0.24               | 0.17                          | 3.62               |
| TDL(O2)/GN  | -3.76     | -3.53     | 0.24               | 0.18                          | 3.59               |
| IBN(O1)/GN  | -3.76     | -3.52     | 0.24               | 0.18                          | 3.58               |
| IBN(O2)/GN  | -3.76     | -3.52     | 0.24               | 0.17                          | 3.59               |
| NPX(O1)/GN  | -3.75     | -3.51     | 0.24               | 0.17                          | 3.57               |
| NPX(O2)/GN  | -3.76     | -3.52     | 0.24               | 0.18                          | 3.58               |
| DPP(O1)/NGN | -2.67     | -2.05     | 0.63               | 0.17                          | 2.50               |
| PCL(O2)/NGN | -2.71     | -2.12     | 0.59               | 0.12                          | 2.58               |
| TDL(O1)/NGN | -2.69     | -2.07     | 0.63               | 0.18                          | 2.52               |
| IBN(O2)/NGN | -2.70     | -2.06     | 0.64               | 0.19                          | 2.51               |
| NPX(O2)/NGN | -2.69     | -2.09     | 0.61               | 0.17                          | 2.53               |

**Table S3.** Electronic properties of analgesic/nanosheet complexes in the aqueous phase.

| Complex     | Aqueous Phase |           |                    |                               |                    |
|-------------|---------------|-----------|--------------------|-------------------------------|--------------------|
|             | HOMO (eV)     | LUMO (eV) | HOMO-LUMO Gap (eV) | Lowest Energy Excitation (eV) | Work Function (eV) |
| DPP(O1)/GN  | -3.88         | -3.64     | 0.24               | 0.16                          | 3.71               |
| DPP(O2)/GN  | -3.90         | -3.67     | 0.24               | 0.16                          | 3.74               |
| PCL(O1)/GN  | -3.89         | -3.65     | 0.24               | 0.16                          | 3.72               |
| PCL(O2)/GN  | -3.88         | -3.64     | 0.24               | 0.16                          | 3.72               |
| TDL(O1)/GN  | -3.90         | -3.66     | 0.24               | 0.16                          | 3.73               |
| TDL(O2)/GN  | -3.89         | -3.66     | 0.24               | 0.16                          | 3.73               |
| IBN(O1)/GN  | -3.90         | -3.67     | 0.24               | 0.16                          | 3.74               |
| IBN(O2)/GN  | -3.90         | -3.67     | 0.24               | 0.16                          | 3.74               |
| NPX(O1)/GN  | -3.88         | -3.64     | 0.24               | 0.16                          | 3.71               |
| NPX(O2)/GN  | -3.88         | -3.64     | 0.24               | 0.17                          | 3.71               |
| DPP(O1)/NGN | -2.82         | -2.18     | 0.64               | 0.19                          | 2.63               |
| PCL(O2)/NGN | -2.81         | -2.20     | 0.61               | 0.14                          | 2.67               |
| TDL(O1)/NGN | -2.84         | -2.18     | 0.66               | 0.19                          | 2.65               |
| IBN(O2)/NGN | -2.86         | -2.21     | 0.65               | 0.20                          | 2.65               |
| NPX(O2)/NGN | -2.81         | -2.19     | 0.62               | 0.18                          | 2.63               |
